# Supplementary material
Source: PubMed Central journal article supplement (PMC4378386)
Supplement: pnas.201500450SI.pdf [file pnas.201500450SI.pdf]

# Supporting Information

Krabbe et al. 10.1073/pnas.1500450112

## SI Materials and Methods

**Animals.** Mice expressing the human D2R under control of the tetO promoter were generated on a C57BL/6-CBA(J) background and backcrossed for >10 generations to the C57BL/6(J) background. Crossing these animals with mice expressing the tetracycline transactivator (tTA) transgene under the calcium/calmodulin-dependent kinase II $\alpha$  (CaMKII $\alpha$ ) promoter (1) (129SveV<sub>Tac</sub>) background, backcrossed for >20 generations, resulted in double-transgenic mice expressing human D2Rs selectively in striatal medium spiny neurons. Littermates carrying a single transgene (tetO-hD2R or CaMKII $\alpha$ -tTA) or no transgene were used as controls (2). Animals were housed in groups on a 12-h light/12-h dark cycle. Mice that received tracer injections were individually housed after surgery. Food and water were available ad libitum.

## In Vivo Extracellular Single-Unit Recordings and Juxtacellular Labeling.

Mice were anesthetized with isoflurane (Forene, Abbott GmbH) in O<sub>2</sub> at a rate of 0.35 L/min<sup>-1</sup> [2.5% (vol/vol) for induction, 1.0–1.8% for maintenance] after i.p. injection of atropine (0.1 mg/kg of body weight) and s.c. injection of glucose in H<sub>2</sub>O (1 g/kg of body weight). Animals were placed on a heating pad in a stereotaxic frame (David Kopf Instruments). Rectal temperature (34–36 °C), heart rate (5–8 Hz), respiration (1–2 Hz), and electrocorticograms were constantly monitored as measure of anesthetic level. Stereotaxic coordinates were derived from and provided relative to bregma. Epidural electrocorticograms were recorded using two 1-mm stainless-steel screws above the left cortex (rostral: +2.1 mm, lateral: 1.2 mm) and ipsilateral cerebellum (caudal: –5.5 to –6.5 mm, lateral: 1.2 mm). Bilateral craniotomies for single-unit recordings were performed at the following coordinates: VTA: caudal: –3.60 mm, lateral: 0.2–0.8 mm, recording depth: 3.0–4.2 mm; SN: caudal: –3.08 mm, lateral: 0.8–1.4 mm, recording depth: 3.2–4.4 mm. Rostrocaudal coordinates were adjusted to the skull size (VTA: –3.6 mm/4.2 \* distance [bregma-lambda] + 0.2 mm, SN: –3.08 mm/4.2 \* distance [bregma-lambda] + 0.33 mm). Lateral coordinates were aligned to the sagittal sinus to avoid rupture of the blood vessel.

Single-unit recordings were carried out using glass microelectrodes (15–25 M $\Omega$ , borosilicate capillaries; Harvard Apparatus) filled with 0.5 M NaCl, 10 mM Hepes, and 1.5% (wt/vol) neurobiotin (Vector Laboratories), which were lowered to the target area with a micromanipulator (SM-6; Luigs & Neumann). Extracellular signals were amplified 1,000-fold (ELC-03M; npI Electronics), notch- and bandpass-filtered (50 Hz–5 kHz, DFA-2FS; npI Electronics), and digitized with an EPC-10 A/D converter (Heka Electronics). Sampling rates were set to 12.5 kHz for spike trains and to 20 kHz for action potential waveform recording. Additionally, neuronal activity was displayed on an analog oscilloscope (Combiscope HM1008-2; HAMEG Instruments) and an audio monitor (AUDIS-01; npI Electronics). Putative DA neurons were identified by broad triphasic action potentials ( $\geq 1.1$  ms) (3) and a spontaneous activity of 0.1–10 Hz. Discharges occurred as single-spike or burst activity with regular or irregular firing patterns. Following recording ( $\geq 10$  min), neurons were labeled with neurobiotin using the juxtacellular technique (4). Positive current pulses (1–12 nA, 200 ms ON/OFF pulses) were applied through the microelectrode. Neuronal activity was constantly monitored, and the current amplitude was adjusted to obtain an increase of action potential firing selectively during ON pulses. Single-cell labeling was usually successful if entrainment of neuronal activity lasted

for  $\geq 25$  s and spontaneous discharges continued after current application.

Data were analyzed using Igor Pro-6.02 (WaveMetrics) with a NeuroMatic plug-in ([www.neuromatic.thinkrandom.com](http://www.neuromatic.thinkrandom.com)), R statistical computing ([www.r-project.org](http://www.r-project.org)), and MATLAB 7 (MathWorks). Spontaneous firing rates and the CV were analyzed from  $\geq 10$ -min spike train recordings. Interspike interval histograms were generated using 10-ms bins. To analyze bursting activity in detail, the classical 80/160-ms burst criterion (5) was applied. In brief, the beginning of a burst was defined when two spikes occurred within  $\leq 80$  ms, and the end was defined as soon as an interspike interval exceeded 160 ms. Bursts were further analyzed with respect to the mean number of spikes per burst, mean intraburst frequency, and maximum firing frequency. Action potential waveform parameters were derived from at least 20 individual spikes. The action potential width was measured from the beginning of the first peak to the trough.

Autocorrelation histograms (ACHs) were plotted in R (1-ms bins, smoothed with a Gaussian filter) to determine the dominant activity pattern by visual inspection: single-spike oscillatory, single-spike irregular, bursty oscillatory, or bursty irregular (6–8). Single-spike oscillatory-classified ACHs featured three or more equally distant peaks with decreasing amplitudes. Bursting neurons displayed a narrow initial peak, which was followed by a return to steady state (bursty irregular) or equidistant broader peaks with decreasing amplitudes (bursty oscillatory). All other cells were classified as single-spike irregular.

We also fitted a GLO stochastic model (7, 8) to the obtained spike trains to investigate irregularity and burstiness in more detail. The GLO model was developed for the description of characteristic in vivo firing patterns in dopaminergic spike trains and contains two stochastic steps. In the first step, a background oscillator with normally distributed intervals with oscillation period  $\mu$  and variance  $\sigma_1^2$  generates a background oscillation whose irregularity depends on  $\sigma_1/\mu$ . In the second step, each background event is assumed to give rise to a Poissonian number of spikes with expectation  $\lambda$  ( $\lambda > 1$  in the bursty case,  $m = 1$ ) or to a single spike with probability  $\lambda$  ( $\lambda < 1$  in the single-spike case,  $m = 0$ ). The spikes are then placed around the backbone beat according to a normal distribution with an SD (or burst width) of  $\sigma_2$ . Therefore, the GLO parameters can be used to measure irregularity and burstiness: The irregularity parameter  $\theta = \sqrt{(\sigma_1^2 + 2\sigma_2^2)}/\mu$  combines the irregularity of the background oscillation with the width of the bursts,  $\sigma_2$ , because bursts of high width may overlap, and thus increase irregularity. In addition, a value of  $\lambda$  much smaller than 1 for the single-spike case indicates a small probability of firing per background beat, and thus higher irregularity. The parameters can be estimated by fitting the empirical autocorrelation function to the empirical ACH of the obtained spike trains. The classification of firing patterns into the four classes of oscillatory bursty, oscillatory single spike, irregular bursty, and irregular single spike relies on the parameter  $m$ , which primarily uses the existence or absence of a central peak in the ACH to distinguish between bursty ( $m = 1$ ) and single spike ( $m = 0$ ). Irregularity is determined by a threshold on the parameter  $\theta$  (compare ref. 8). We chose a threshold of  $\theta = 0.35$  for cells firing in a single-spike fashion, whereas the threshold was set to  $\theta = 0.4$  for cells firing bursts (7), because of the generally lower oscillatory nature of bursty spike trains. An additional parameter  $\beta = \mu/\sigma_2$  (i.e., the reciprocal of the relative burst width) was used to classify extremely irregular spike trains.

Independent of the other parameters, spike trains with  $\beta < 3$  were defined as irregular.

When fitting the GLO to the obtained spike trains, 12 spike trains needed to be excluded due to improper fits (five in D2R-OE, five in Dox-treated control, and two in Dox-treated D2R-OE), and the reported analyses refer to the remaining 119 spike trains. The classification of firing patterns displayed in the main text always relates to the GLO fitting; these results can be compared with the visual evaluation given in Tables S2, S3, and S5.

**Immunohistochemistry and Confocal Analysis.** After electrophysiological in vivo recordings, mice were deeply anesthetized with i.p. pentobarbital (0.7 g/kg of body weight, Narcoren; Merial GmbH) and transcardially perfused with an ice-cold solution containing 4% (wt/vol) paraformaldehyde and 15% (vol/vol) picric acid in phosphate buffer. After postfixation overnight at 4 °C, brains were sectioned in coronal slices (60  $\mu$ m) using a vibratome (VT1000S; Leica). Free-floating sections were rinsed with PBS four times before incubation in blocking solution [10% (vol/vol) horse serum, 0.2% BSA, and 0.5% Triton X-100 in PBS] for 2 h at room temperature (20–22 °C). Subsequently, the blocking solution was replaced by the primary antibody diluted in carrier solution (1% horse serum, 0.2% BSA, and 0.5% Triton X-100 in PBS). Monoclonal mouse anti-TH antibody (1:750, catalog no. MAB318; Millipore) or polyclonal rabbit anti-TH antibody (1:1,000, catalog no. 657012; Millipore) was used for staining of DA midbrain neurons. After overnight incubation at room temperature, sections were washed with PBS four times before adding the secondary antibody and Alexa Fluor 488 streptavidin (1:1,000, catalog no. S11223; Molecular Probes) diluted in carrier solution. The following secondary antibodies were used at a ratio of 1:750: Alexa Fluor 568 (catalog no. A-11036) or Alexa Fluor 647 (catalog no. A-21245) and goat anti-rabbit IgG or Alexa Fluor 647 goat anti-mouse IgG (catalog no. A-21236; all from Molecular Probes). Incubation overnight at room temperature was followed by final washing with PBS (four times). Sections were mounted on slides and coverslipped. For confocal analysis, a laser-scanning confocal microscope (LSM 510 Meta; Zeiss) controlled with LSM software (version 3.2; Zeiss) was used. Overview pictures for localization of neurons within the midbrain subnuclei were acquired with a 10 $\times$ /0.3 lens. A 63 $\times$ /1.4 oil immersion lens was used for identification of the neurochemical phenotype. Identical confocal settings were chosen for all scanning sessions.

**Retrograde Tracing.** Stereotactic surgical procedures were performed as described for electrophysiological in vivo recordings. For retrograde labeling of mesolimbic DA VTA and nigrostriatal DA SN neurons, rhodamine-coupled latex microspheres (Retrobeads; Lumafuor) were used. Retrobeads were diluted 1:2 in sterile artificial cerebrospinal fluid and injected bilaterally into the NAc shell and core (45–60 nL; coordinates from bregma: rostral: +1.6 mm, lateral: 0.8 mm, ventral: 4.0 mm), or the dorsal striatum [caudate putamen (CPu); 2  $\times$  60 nL; coordinates from bregma: rostral: +0.98 mm, lateral: 1.90 mm, ventral: 3.20 mm; rostral: –0.10 mm, lateral: 2.70 mm, ventral: 3.20 mm; all coordinates according to Paxinos and Franklin (9)] with a NanoFil syringe attached to a micropump (rate of 30 nL $\cdot$ min $^{-1}$  for DA VTA tracing, 50 nL $\cdot$ min $^{-1}$  for DA SN tracing; UMP3, World Precision Instruments). Animals were killed 14 d (NAc) or 7 d (CPu) after retrobead injection for UV-LMD and RT-qPCR.

For verification of tracer deposition, injection sites were fixated in 4% (wt/vol) paraformaldehyde in phosphate buffer overnight at 4 °C and cut in coronal slices (60  $\mu$ m) using a vibratome. Fluorescent immunostaining for TH of free-floating sections was performed essentially as described above (primary antibody: rabbit anti-TH, 1:1,000, catalog no. 657012, Millipore; secondary antibody: Alexa Fluor 488 goat anti-rabbit IgG, 1:1,000, catalog no. A-11008, Molecular Probes).

**qPCR Assay of Retrogradely Labeled Neurons.** Details of all qPCR assays (TaqMan) and their respective standard curve parameters (derived from mouse midbrain tissue) used for RT-qPCR analysis in this study are provided in Table S5. The cDNA amount per cell in relation to the used standard was calculated according to Gründemann et al. (10):

$$cDNA \text{ amount per cell} = \frac{S[(C_T - Y_{intercept}) / \text{slope}]}{No_{cells} \bullet cDNA \text{ fraction}},$$

with  $S$  being the serial dilution factor of the standard curve (i.e., ref. 10),  $No_{cells}$  being the number of captured neurons per UV-LMD pool (i.e., 10),  $cDNA \text{ fraction}$  being the fraction of the UV-LMD cDNA reaction sample that was used in an individual PCR assay (i.e., 5/17), and a  $Y_{intercept}$  of 42 for all assays.

- Mayford M, et al. (1996) Control of memory formation through regulated expression of a CaMKII transgene. *Science* 274(5293):1678–1683.
- Kellendonk C, et al. (2006) Transient and selective overexpression of dopamine D2 receptors in the striatum causes persistent abnormalities in prefrontal cortex functioning. *Neuron* 49(4):603–615.
- Ungless MA, Magill PJ, Bolam JP (2004) Uniform inhibition of dopamine neurons in the ventral tegmental area by aversive stimuli. *Science* 303(5666):2040–2042.
- Pinault D (1996) A novel single-cell staining procedure performed in vivo under electrophysiological control: Morpho-functional features of juxtacellularly labeled thalamic cells and other central neurons with biocytin or Neurobiotin. *J Neurosci Methods* 65(2):113–136.
- Grace AA, Bunney BS (1984) The control of firing pattern in nigral dopamine neurons: burst firing. *J Neurosci* 4(11):2877–2890.
- Wilson CJ, Young SJ, Groves PM (1977) Statistical properties of neuronal spike trains in the substantia nigra: Cell types and their interactions. *Brain Res* 136(2):243–260.
- Schiemann J, et al. (2012) K-ATP channels in dopamine substantia nigra neurons control bursting and novelty-induced exploration. *Nat Neurosci* 15(9):1272–1280.
- Bingmer M, Schieman J, Roeper J, Schneider G (2011) Measuring burstiness and regularity in oscillatory spike trains. *J Neurosci Methods* 201(2):426–437.
- Paxinos G, Franklin KBJ (2007) *The Mouse Brain in Stereotaxic Coordinates* (Academic, New York).
- Gründemann J, Schlaudraff F, Liss B (2011) UV-laser microdissection and mRNA expression analysis of individual neurons from postmortem Parkinson's disease brains. *Methods Mol Biol* 755:363–374.

**Table S1. Summary of results of in vivo single-unit recordings and complete statistical results**

|                                   | VTA              |                  |                | SN               |                  |                |          |
|-----------------------------------|------------------|------------------|----------------|------------------|------------------|----------------|----------|
| Variable                          | Control          | D2R-OE           | <i>P</i> value | control          | D2R-OE           | <i>P</i> value | Test     |
| Firing parameters                 |                  |                  |                |                  |                  |                |          |
| Mean frequency, Hz                | 3.7 ± 0.4        | 2.4 ± 0.3        | 0.010*         | 4.6 ± 0.5        | 3.9 ± 0.4        | 0.291          | <i>t</i> |
| Action potential duration, ms     | 1.43 ± 0.05      | 1.34 ± 0.04      | 0.112          | 1.48 ± 0.09      | 1.40 ± 0.07      | 0.498          | <i>t</i> |
| Burst rate, min <sup>-1</sup>     | 4.4 (0.8/16.4)   | 0.4 (0/4.1)      | 0.005**        | 2.5 (0.8/14.2)   | 3.6 (0.7/13.8)   | 0.868          | MWU      |
| % SFB                             | 5.3 (1.3/29.6)   | 0.5 (0/6.5)      | 0.012*         | 2.7 (0.8/22.3)   | 5.2 (0.8/21.8)   | 0.819          | MWU      |
| CV, %                             | 58.1 (37.5/99.9) | 53.0 (32.3/83.9) | 0.551          | 46.0 (25.6/53.3) | 59.6 (34.3/83.9) | 0.077          | MWU      |
|                                   | <i>n</i> = 28    | <i>n</i> = 22    |                | <i>n</i> = 16    | <i>n</i> = 14    |                |          |
| Burst characteristics             |                  |                  |                |                  |                  |                |          |
| Spikes per burst                  | 2.6 (2.3/3.1)    | 2.4 (2.2/2.8)    | 0.478          | 2.9 (2.1/3.5)    | 2.6 (2.1/3.3)    | 0.661          | MWU      |
| Short bursts (2 spikes), %        | 59.3 ± 5.6       | 64.3 ± 7.9       | 0.603          | 57.3 ± 7.2       | 62.2 ± 7.3       | 0.645          | <i>t</i> |
| Long bursts (≥5 spikes), %        | 4.0 (0/9.3)      | 0 (0/1.8)        | 0.078          | 1.8 (0/21.9)     | 2.2 (0/15.6)     | 0.773          | MWU      |
| Mean intraburst frequency, Hz     | 15.2 (13.4/17.0) | 16.8 (13.3/20.7) | 0.389          | 13.6 (11.6/15.9) | 13.5 (12.9/15.1) | 0.819          | MWU      |
| Maximum frequency, Hz             | 38.3 (21.8/57.3) | 30.1 (22.1/97.0) | 0.902          | 27.9 (21.0/35.5) | 30.5 (18.7/41.6) | 0.633          | MWU      |
|                                   | <i>n</i> = 25    | <i>n</i> = 13    |                | <i>n</i> = 16    | <i>n</i> = 14    |                |          |
| Pattern analysis                  |                  |                  |                |                  |                  |                |          |
| Visual classification, % of cells |                  |                  |                |                  |                  |                |          |
| Single-spike oscillatory          | 28.57            | 31.82            | 0.403          | 62.50            | 21.43            | 0.091          | $\chi^2$ |
| Single-spike irregular            | 42.86            | 59.09            |                | 18.75            | 57.14            |                |          |
| Bursty oscillatory                | 10.71            | 4.55             |                | 12.50            | 7.14             |                |          |
| Bursty irregular                  | 17.86            | 4.55             |                | 6.25             | 14.29            |                |          |
|                                   | <i>n</i> = 28    | <i>n</i> = 22    |                | <i>n</i> = 16    | <i>n</i> = 14    |                |          |
| GLO classification, % of cells    |                  |                  |                |                  |                  |                |          |
| Single-spike oscillatory          | 35.71            | 42.11            | 0.687          | 62.50            | 58.33            | 0.212          | $\chi^2$ |
| Single-spike irregular            | 28.57            | 36.84            |                | 6.25             | 16.67            |                |          |
| Bursty oscillatory                | 17.86            | 15.79            |                | 31.25            | 8.33             |                |          |
| Bursty irregular                  | 17.86            | 5.26             |                | 0                | 16.67            |                |          |
|                                   | <i>n</i> = 28    | <i>n</i> = 19    |                | <i>n</i> = 16    | <i>n</i> = 12    |                |          |

This table is related to Fig. 1. To compare genotypes, data that were normally distributed were statistically tested using a Student's *t* test (*t*); in such case, we present the mean ± SEM for each genotype. In the case of nonnormally distributed data (criteria are discussed in *Materials and Methods*), the MWU test was applied, and we provide median values (25–75% quantiles). The distribution of in vivo firing patterns was analyzed using Pearson's  $\chi^2$  test. For all datasets, *n* depicts the number of cells used in each test and *N* is the number of animals from which the neurons were derived (DA VTA neurons: control: *n* = 14; D2R-OE: *n* = 8; DA SN neurons: control: *n* = 8, D2R-OE: *n* = 7). \**P* < 0.05; \*\**P* < 0.01.



**Table S3. Details of GLO analysis: Results of GLO analysis for DA VTA and DA SN neurons from control and D2R-OE mice after switching off transgenic overexpression with Dox treatment**

| Parameter      | DA VTA neurons + Dox |                  |           |                  | DA SN neurons + Dox |                   |                  |                  |
|----------------|----------------------|------------------|-----------|------------------|---------------------|-------------------|------------------|------------------|
|                | Single spike         |                  | Bursty    |                  | Single spike        |                   | Bursty           |                  |
|                | Control              | D2R-OE           | P value   |                  | Control             | D2R-OE            | P value          |                  |
| $\theta$       | 0.44 (0.40–0.68)     | 0.21 (0.17–0.31) | 0.0003*** | 0.42 (0.37–0.49) | 0.4                 | 0.30 (0.26–0.33)  | 0.25 (0.22–0.27) | 0.62 (0.52–0.90) |
| $\sigma_1/\mu$ | 0.26 (0.12–0.33)     | 0.18 (0.12–0.22) | 0.51      | 0.28 (0.37–0.49) | 0.28                | 0.27 (0.23–0.29)  | 0.16 (0.14–0.18) | 0.43 (0.39–0.48) |
| $\sigma_2/\mu$ | 0.23 (0.16–0.48)     | 0.07 (0.02–0.11) | 0.01*     | 0.22 (0.17–0.27) | 0.19                | 0.06 (0.001–0.12) | 0.13 (0.08–0.17) | 0.32 (0.19–0.55) |
| $\lambda$      | 0.69 (0.59–0.85)     | 0.92 (0.90–0.98) | 0.034*    | 2.3 (2.2–2.9)    | 3.0                 | 0.85 (0.80–0.89)  | 0.94 (0.88–0.99) | 2.3 (1.8–3.1)    |
|                | $n = 9$              | $n = 12$         |           | $n = 3$          | $n = 2$             | $n = 4$           | $n = 4$          | $n = 4$          |
|                |                      |                  |           |                  |                     |                   |                  | $n = 6$          |

Parameters are as follows:  $\theta$  (irregularity parameter) =  $\sqrt{(\sigma_1^2 + 2\sigma_2^2)/\mu}$ , corresponds to inverse height of first ACH-side peak relative to baseline level and incorporates the following two irregularity parameters:  $\sigma_1/\mu$  (irregularity of background oscillation) = SD of background increments, relative to the oscillation period;  $\sigma_2/\mu$  (relative burst width/coupling to background oscillation) = SD of spikes placed around a background beat, relative to the oscillation period.  $\lambda$  = expected number of spikes per background beat. (i) in the bursty case: expected number of spikes per burst, with number of spikes following a Poisson distribution, and (ii) in the single-spike case: probability to observe a spike at a background beat. This table is related to Figs. 2 and 4. Because most distributions were asymmetrical, we applied the MWU test to compare genotypes and provide the median (25–75% quantiles) for each genotype for each parameter. Because the investigated parameters tend to differ between bursty and single-spike cells, we performed separate statistical comparisons for these groups, applying MWU tests. Statistical tests were only performed if the sample size of both samples summed to at least 10. Otherwise, we omitted statistical significance tests. In the interpretation of statistical  $P$  values, we first focused on the irregularity parameter  $\theta$ , applying a Bonferroni correction for the number of performed tests. As a result, only  $P = 0.0003$  was considered significant. The remaining parameters were subjected to exploratory analyses. Statistical significance levels are as follows: \* $P < 0.05$ , \*\*\* $P < 0.001$ .

**Table S4. Summary of results of in vivo single-unit recordings and complete statistical results after Dox treatment**

|                                   | VTA + Dox        |                  |                | SN + Dox         |                   |                |                |
|-----------------------------------|------------------|------------------|----------------|------------------|-------------------|----------------|----------------|
| Variable                          | Control          | D2R-OE           | <i>P</i> value | Control          | D2R-OE            | <i>P</i> value | Test           |
| Firing parameters                 |                  |                  |                |                  |                   |                |                |
| Mean frequency, Hz                | 4.0 ± 0.6        | 3.7 ± 0.5        | 0.713          | 4.8 ± 0.6        | 4.4 ± 0.5         | 0.569          | <i>t</i>       |
| Action potential duration, ms     | 1.26 ± 0.05      | 1.24 ± 0.05      | 0.738          | 1.47 ± 0.08      | 1.37 ± 0.04       | 0.272          | <i>t</i>       |
| Burst rate, min <sup>-1</sup>     | 4.9 (0.5/53.3)   | 0.4 (0.03/4.4)   | 0.039*         | 9.7 (2.9/26.1)   | 16.8 (0.6/24)     | 0.925          | MWU            |
| % SFB                             | 5.2 (0.7/53.2)   | 0.6 (0.01/4.3)   | 0.031*         | 9.4 (3.6/41.9)   | 17.3 (0.5/40)     | 0.971          | MWU            |
| CV, %                             | 67.6 (46.5/75.8) | 38.8 (31.2/69.9) | 0.041*         | 76.2 (33.2/96.9) | 62.4 (43.5/103.2) | 0.563          | MWU            |
|                                   | <i>n</i> = 15    | <i>n</i> = 16    |                | <i>n</i> = 10    | <i>n</i> = 10     |                |                |
| Burst characteristics             |                  |                  |                |                  |                   |                |                |
| Spikes per burst                  | 2.4 (2.2/0.3)    | 2.6 (2.4/3.0)    | 0.738          | 3.3 (2.6/4.1)    | 2.9 (2.4/3.9)     | 0.597          | MWU            |
| Short bursts (2 spikes), %        | 61.3 ± 7.7       | 58.0 ± 8.0       | 0.774          | 48.2 ± 7.0       | 43.5 ± 8.9        | 0.685          | <i>t</i>       |
| Long bursts (≥5 spikes), %        | 2.6 (0/15.2)     | 1.6 (0/9.6)      | 0.766          | 17.5 (2.2/26.2)  | 2.3 (0/26.7)      | 0.517          | MWU            |
| Mean intraburst frequency, Hz     | 14.3 (13.8/16.7) | 13.2 (12.6/16.0) | 0.105          | 13.7 (11.5/14.6) | 12.6 (12.2/15.0)  | 0.796          | MWU            |
| Maximum frequency, Hz             | 45.6 (22.9/68.6) | 32.7 (21.5/40.2) | 0.190          | 34.8 (20.6/51.9) | 39.8 (26.6/60.7)  | 0.796          | MWU            |
|                                   | <i>n</i> = 14    | <i>n</i> = 12    |                | <i>n</i> = 10    | <i>n</i> = 10     |                |                |
| Pattern analysis                  |                  |                  |                |                  |                   |                |                |
| Visual classification, % of cells |                  |                  |                |                  |                   |                |                |
| Single-spike oscillatory          | 13.33            | 50               | 0.046*         | 30               | 40                | 0.088          | χ <sup>2</sup> |
| Single-spike irregular            | 53.33            | 37.50            |                | 30               | 10                |                |                |
| Bursty oscillatory                | 0                | 6.25             |                | 0                | 40                |                |                |
| Bursty irregular                  | 33.33            | 6.25             |                | 40               | 10                |                |                |
|                                   | <i>n</i> = 15    | <i>n</i> = 16    |                | <i>n</i> = 10    | <i>n</i> = 10     |                |                |
| GLO classification, % of cells    |                  |                  |                |                  |                   |                |                |
| Single-spike oscillatory          | 16.67            | 71.43            | 0.024*,†       | 50               | 40                | 0.044*,‡       | χ <sup>2</sup> |
| Single-spike irregular            | 58.33            | 14.29            |                | 0                | 0                 |                |                |
| Bursty oscillatory                | 8.33             | 7.14             |                | 0                | 50                |                |                |
| Bursty irregular                  | 16.67            | 7.14             |                | 50               | 10                |                |                |
|                                   | <i>n</i> = 12    | <i>n</i> = 14    |                | <i>n</i> = 10    | <i>n</i> = 10     |                |                |

This table is related to Fig. 4. To compare genotypes, data that were normally distributed were statistically tested using a Student's *t* test (*t*); in such case, we present the mean ± SEM for each genotype. In the case of nonnormally distributed data (criteria are discussed in *Materials and Methods*), the MWU test was applied and we provide median values (25–75% quantiles). The distribution of in vivo firing patterns was analyzed using Pearson's χ<sup>2</sup> test. In the case of a significant χ<sup>2</sup> test result, we performed Fisher's exact test and report only the statistically significant results of those tests (symbols listed below). For all datasets, *n* depicts the number of cells used in each test and *N* is the number of animals from which the neurons were derived (DA VTA neurons: control: *n* = 6; D2R-OE: *n* = 6; DA SN neurons: control: *n* = 5, D2R-OE: *n* = 4).

\**P* < 0.05.

†Fisher's exact test: *P* (single-spike oscillatory) = 0.008, *P* (single-spike irregular) = 0.038.

‡Fisher's exact test: *P* (bursty oscillatory) = 0.036.

Table S5. Details of qPCR assays, amplicons, and assay-specific standard curve parameters

| Assay ID      | Target gene<br>sequence-quencher (primer sequences) | GenBank accession<br>no. (NCBI) | Amplicon<br>length, bp | Exon<br>spanning | Threshold | Standard curve data |              |             |
|---------------|-----------------------------------------------------|---------------------------------|------------------------|------------------|-----------|---------------------|--------------|-------------|
|               |                                                     |                                 |                        |                  |           | Y-intercept         | Slope        | $R^2$       |
| Mm01336438_m1 | Mouse mNR1<br>FAM-TCTACTCTGACAAGAGCATCCACCT-NFQ     | NM_001177656.1                  | 63                     | 2-3              | 0.7       | 42.01 ± 0.09        | -3.42 ± 0.07 | 0.99 ± 0.00 |
| Mm00433801_m1 | Mouse mNR2A<br>FAM-ACTCTGCACCAATTATGGTCAATG-NFQ     | NM_008170.2                     | 58                     | 2-3              | 0.55      | 44.29 ± 0.19        | -3.33 ± 0.04 | 0.99 ± 0.00 |
| Mm01265041_m1 | Mouse mNR2B<br>FAM-CTTCTACAAACCAAGAGAGTCGACG-NFQ    | NM_008171.3                     | 62                     | 3-4              | 0.55      | 43.20 ± 0.08        | -3.20 ± 0.04 | 0.99 ± 0.00 |
| Mm00439181_g1 | Mouse mNR2C<br>FAM-ACCACACCTTCAGCAGCGGGGATAT-NFQ    | NM_010350.2                     | 74                     | 7-8              | 0.75      | 46.35 ± 0.22        | -3.31 ± 0.12 | 0.99 ± 0.01 |
| Mm01194083_g1 | Mouse mNR2D<br>FAM-CGTACCCACACAGCCCTCGCCTGACG-NFQ   | NM_008172.2                     | 74                     | 4-5              | 0.5       | 42.80 ± 0.42        | -3.35 ± 0.08 | 0.99 ± 0.01 |

Details of all qPCR assays (TaqMan) and their respective standard curve parameters (derived from mouse midbrain tissue) used for RT-qPCR analysis in this study. Assay accession no. is as given by Applied Biosystems. Threshold indicates the value at which real-time PCR cycle thresholds were analyzed and  $n$  represents the number of independent experiments for standard curve data generation. FAM, Applied Biosystems dye; NCBI, National Center for Biotechnology Information; NFQ, nonfluorescent quencher.
